# Supplementary material
Source: MDPI journal article supplement (https://www.mdpi.com/2073-4433/14/5/817)
Supplement: s1 [file s1 › atmosphere-2246283-supplementary.pdf]

## Supplementary Material

### Atmospheric observation of fluorinated greenhouse gases around four chemical plants in China

**Table S1.** Sample information and meteorological conditions during sampling in each plant.

| Plant | Test | Sampling site | Wind direction | Wind speed (m/s) | Ambient temperature (°C) |
|-------|------|---------------|----------------|------------------|--------------------------|
| A     | 1    | U 1           | South          | 0.3              | 13                       |
|       |      | D 1           | South          | 1.0              | 14                       |
|       | 2    | U 2           | Northwest      | 1.0              | 14                       |
|       |      | D 2           | Northwest      | 1.7              | 17                       |
|       | 3    | U 3           | Southwest      | 0.6              | 7                        |
|       |      | D 3           | Southwest      | 1.1              | 9                        |
|       | 4    | U 4           | Southwest      | 5.4              | 20                       |
|       |      | D 4           | Southwest      | 4.7              | 23                       |
|       | 5    | U 5           | Southwest      | 2.0              | 16                       |
|       |      | D 5           | Southwest      | 1.9              | 14                       |
|       | 6    | U 6           | East–Northeast | 6.6              | 12                       |
|       |      | D 6           | East–Northeast | 11.8             | 13                       |
|       | 7    | U 7           | Northeast      | 7.6              | 15                       |
|       |      | D 7           | Northeast      | 8.1              | 13                       |
|       | 8    | U 8           | East           | 4.1              | 8                        |
|       |      | D 8           | East           | 2.9              | 8                        |
| B     | 1    | U 1           | Southwest      | 4.0              | 13                       |
|       |      | D 1           | Southwest      | 4.0              | 13                       |
|       | 2    | U 2           | West           | 5.0              | 17                       |
|       |      | D 2           | West           | 5.0              | 17                       |
|       | 3    | U 3           | Southwest      | 3.0              | 11                       |
|       |      | D 3           | Southwest      | 3.0              | 11                       |
|       | 4    | U 4           | Southwest      | 2.0              | 18                       |
|       |      | D 4           | Southwest      | 2.0              | 18                       |
|       | 5    | U 5           | Northeast      | 1.0              | 13                       |
|       |      | D 5           | Northeast      | 1.0              | 13                       |
|       | 6    | U 6           | Northeast      | 2.0              | 18                       |
|       |      | D 6           | Northeast      | 2.0              | 18                       |
|       | 7    | U 7           | Northeast      | 1.0              | 13                       |
|       |      | D 7           | Northeast      | 1.0              | 13                       |
| C     | 1    | U 1           | Southeast      | 2.3              | 20                       |
|       |      | D 1           | Southeast      | 2.2              | 20                       |
|       | 2    | U 2           | Southeast      | 2.2              | 20                       |

|   |   |     |           |     |    |
|---|---|-----|-----------|-----|----|
| D | 3 | D 2 | Southeast | 2.1 | 20 |
|   |   | U 3 | Southeast | 1.8 | 16 |
|   |   | D 3 | Southeast | 1.7 | 16 |
|   | 4 | U 4 | Southeast | 2.0 | 18 |
|   |   | D 4 | Southeast | 2.1 | 18 |
|   | 5 | U 5 | Southeast | 2.2 | 19 |
|   |   | D 5 | Southeast | 2.4 | 19 |
|   | 6 | U 6 | East      | 1.7 | 21 |
|   |   | D 6 | East      | 1.6 | 21 |
|   | 7 | U 7 | East      | 1.5 | 22 |
|   |   | D 7 | East      | 1.8 | 21 |
|   | 8 | U 8 | East      | 2.4 | 16 |
|   |   | D 8 | East      | 2.5 | 16 |
|   | 1 | U 1 | North     | 2.0 | 22 |
|   |   | D 1 | North     | 2.0 | 22 |
|   | 2 | U 2 | Northwest | 1.8 | 28 |
|   |   | D 2 | Northwest | 1.8 | 28 |
|   | 3 | U 3 | North     | 1.5 | 24 |
|   |   | D 3 | North     | 1.5 | 24 |
|   | 4 | U 4 | North     | 1.5 | 24 |
|   |   | D 4 | North     | 1.5 | 24 |
|   | 5 | U 5 | North     | 1.8 | 29 |
|   |   | D 5 | North     | 1.8 | 29 |
|   | 6 | U 6 | Northwest | 2.5 | 25 |
|   |   | D 6 | Northwest | 2.5 | 25 |
|   | 7 | U 7 | North     | 2.0 | 26 |
|   |   | D 7 | North     | 2.0 | 26 |

**Table S2.** The background concentrations of each F-gas.

| Substance                      | background concentrations<br>(pptv) |
|--------------------------------|-------------------------------------|
| CF <sub>4</sub>                | 88                                  |
| PFC-116                        | 5                                   |
| PFC-218                        | 0.7                                 |
| PFC-318                        | 2                                   |
| C <sub>4</sub> F <sub>10</sub> | 0.2                                 |
| C <sub>6</sub> F <sub>14</sub> | 0.3                                 |
| SF <sub>6</sub>                | 11                                  |
| HFC-23                         | 36                                  |
| HFC-32                         | 29                                  |
| HFC-125                        | 38                                  |
| HFC-134a                       | 127                                 |
| HFC-143a                       | 28                                  |
| HFC-152a                       | 11                                  |
| HFC-227ea                      | 2                                   |

|            |     |
|------------|-----|
| HFC-236fa  | 0.2 |
| HFC-245fa  | 4   |
| HFC-365mfc | 1   |
